# Supplementary material for: Association Between Sleep Duration and Diabetes in Black and White Adults
Source: PubMed Central journal article supplement — Diabetes Care. 2013 Oct 15;36(11):3557–65. doi: 10.2337/dc13-0777 (PMC3816913; doi:10.2337/dc13-0777), 2013-10-15
Supplement: supp_dc13-0777v130777_DC130777SupplementaryData.pdf [file supp_dc13-0777v130777_DC130777SupplementaryData.pdf]

SUPPLEMENTARY DATA

**Supplementary Table 1.** A Comparison of Sociodemographic, Health Behaviors and Clinical Characteristics by Diabetes among NHIS participants, 2004-2011 (N=130,943).

|                                | <b>Diabetes</b> | <b>No Diabetes</b> | <b>Total</b> |
|--------------------------------|-----------------|--------------------|--------------|
| <b>Sample size, N (%)</b>      | 13,255 (9)      | 117,688 (91)       | 130,943      |
| <b>Age, year ± SE</b>          | 60.8 ± 0.16     | 49.5 ± 0.09        | 50.6 ± 0.09  |
| <b>Age group, (%)</b>          |                 |                    |              |
| 35-49                          | 21              | 53                 | 50           |
| 50-64                          | 39              | 28                 | 30           |
| ≥65                            | 40              | 18                 | 20           |
| <b>Women</b>                   | 49              | 51                 | 51           |
| <b>Race/ethnicity</b>          |                 |                    |              |
| Non-Hispanic white men         | 43              | 43                 | 43           |
| Non-Hispanic black men         | 38              | 45                 | 44           |
| Non-Hispanic white women       | 8               | 5                  | 6            |
| Non-Hispanic black women       | 10              | 6                  | 7            |
| <b>Educational attainment</b>  |                 |                    |              |
| <High school                   | 37              | 30                 | 31           |
| High school graduate           | 17              | 9                  | 9            |
| Some college                   | 28              | 30                 | 29           |
| ≥ College                      | 18              | 31                 | 30           |
| <b>Marital status</b>          |                 |                    |              |
| Married                        | 59              | 62                 | 62           |
| Divorced/separated/widowed     | 32              | 22                 | 23           |
| Never married                  | 9               | 16                 | 52           |
| <b>Living in poverty</b>       |                 |                    |              |
| <b>Class of worker</b>         | 12              | 8                  | 8            |
| Private wage                   | 72              | 70                 | 71           |
| Government                     | 18              | 21                 | 19           |
| Self employed                  | 10              | 9                  | 10           |
| <b>Occupation</b>              |                 |                    |              |
| Professional/Management        | 16              | 22                 | 21           |
| Support services               | 46              | 46                 | 46           |
| Laborers                       | 42              | 32                 | 33           |
| <b>Health behaviors</b>        |                 |                    |              |
| Usual sleep (hours)            | 7.3 ± 0.02      | 7.1 ± 0.01         | 7.1 ± 0.01   |
| Smoking status                 |                 |                    |              |
| Never                          | 46              | 43                 | 52           |
| Current                        | 37              | 25                 | 26           |
| Former                         | 17              | 17                 | 22           |
| Alcohol consumption            |                 |                    |              |
| Never                          | 25              | 16                 | 17           |
| Current                        | 44              | 69                 | 66           |
| Former                         | 31              | 15                 | 17           |
| Leisure-time physical activity |                 |                    |              |
| Never/unable                   | 50              | 33                 | 35           |
| Low                            | 26              | 34                 | 33           |

SUPPLEMENTARY DATA

|                                 |             |             |             |
|---------------------------------|-------------|-------------|-------------|
| High                            | 24          | 33          | 32          |
| <b>Clinical characteristics</b> |             |             |             |
| BMI (kg/m <sup>2</sup> )        | 32.0 ± 0.08 | 27.5 ± 0.02 | 27.9 ± 0.03 |
| Overweight/Obese                | 85          | 15          | 66          |
| Obese                           | 55          | 45          | 29          |
| Hypertension (yes)              | 72          | 29          | 33          |
| <b>General health status</b>    |             |             |             |
| Excellent/Very Good             | 22          | 64          | 60          |
| Good                            | 38          | 25          | 26          |
| Fair/Poor                       | 40          | 11          | 14          |
| <b>Region of country</b>        |             |             |             |
| Northeast                       | 16          | 18          | 18          |
| Midwest                         | 28          | 27          | 27          |
| South                           | 43          | 37          | 38          |
| West                            | 14          | 17          | 17          |

Overweight/Obese defined by Body Mass Index  $\geq 25$  kg/m<sup>2</sup>; Obese defined by Body Mass Index  $\geq 30$  kg/m<sup>2</sup>

SUPPLEMENTARY DATA

**Supplementary Table 2.** A Comparison of Sociodemographic, Health Behaviors and Clinical Characteristics by Diabetes and Race/ethnicity among NHIS participants, 2004-2011 (N=130,943).

|                                | Diabetes    |             | No Diabetes |             |
|--------------------------------|-------------|-------------|-------------|-------------|
|                                | Black       | White       | Black       | White       |
| <b>Sample size, N (%)</b>      | 3,612 (13)  | 20,793 (87) | 9,643 (9)   | 96,895 (91) |
| <b>Age, year ± SE</b>          | 58.0 ± 0.29 | 61.4 ± 0.19 | 45.7 ± 0.15 | 50.1 ± 0.10 |
| <b>Age group, (%)</b>          |             |             |             |             |
| 35-49                          | 27          | 19          | 64          | 52          |
| 50-64                          | 40          | 39          | 25          | 29          |
| ≥65                            | 33          | 42          | 12          | 19          |
| <b>Women</b>                   | 56          | 47          | 55          | 51          |
| <b>Educational attainment</b>  |             |             |             |             |
| <High school                   | 34          | 38          | 35          | 30          |
| High school graduate           | 26          | 15          | 14          | 8           |
| Some college                   | 27          | 28          | 32          | 29          |
| ≥ College                      | 13          | 19          | 19          | 33          |
| <b>Marital status</b>          |             |             |             |             |
| Married                        | 41          | 63          | 39          | 65          |
| Divorced/separated/widowed     | 42          | 29          | 27          | 21          |
| Never married                  | 17          | 8           | 33          | 14          |
| <b>Living in poverty</b>       | 25          | 9           | 20          | 6           |
| <b>Class of worker</b>         |             |             |             |             |
| Private wage                   | 68          | 70          | 72          | 71          |
| Government                     | 27          | 20          | 23          | 18          |
| Self employed                  | 5           | 10          | 5           | 11          |
| <b>Occupation</b>              |             |             |             |             |
| Professional/Management        | 9           | 17          | 13          | 23          |
| Support services               | 41          | 43          | 44          | 47          |
| Laborers                       | 50          | 40          | 43          | 31          |
| <b>Health behaviors</b>        |             |             |             |             |
| Usual sleep (hours)            | 7.2 ± 0.04  | 7.3 ± 0.02  | 7.1 ± 0.02  | 7.1 ± 0.01  |
| Smoking status                 |             |             |             |             |
| Never                          | 54          | 44          | 61          | 52          |
| Current                        | 27          | 39          | 15          | 26          |
| Former                         | 18          | 17          | 24          | 22          |
| Alcohol consumption            |             |             |             |             |
| Never                          | 34          | 23          | 28          | 14          |
| Current                        | 36          | 46          | 55          | 70          |
| Former                         | 30          | 31          | 17          | 15          |
| Leisure-time physical activity |             |             |             |             |
| Never/unable                   | 56          | 49          | 45          | 32          |

SUPPLEMENTARY DATA

|                                 |             |             |             |             |
|---------------------------------|-------------|-------------|-------------|-------------|
| Low                             | 24          | 26          | 31          | 35          |
| High                            | 20          | 25          | 25          | 34          |
| <b>Clinical characteristics</b> |             |             |             |             |
| BMI (kg/m <sup>2</sup> )        | 33.0 ± 0.15 | 31.8 ± 0.10 | 29.3 ± 0.06 | 27.3 ± 0.03 |
| Overweight/Obese                | 88          | 84          | 74          | 62          |
| Obese                           | 60          | 54          | 38          | 25          |
| Hypertension (yes)              | 79          | 70          | 36          | 28          |
| <b>General health status</b>    |             |             |             |             |
| Excellent/Very Good             | 16          | 24          | 52          | 66          |
| Good                            | 35          | 38          | 31          | 24          |
| Fair/Poor                       | 48          | 38          | 17          | 10          |
| <b>Region of country</b>        |             |             |             |             |
| Northeast                       | 13          | 16          | 12          | 19          |
| Midwest                         | 19          | 30          | 19          | 29          |
| South                           | 62          | 38          | 60          | 34          |
| West                            | 7           | 16          | 8           | 19          |

Overweight/Obese defined by Body Mass Index  $\geq 25$  kg/m<sup>2</sup>; Obesity defined by Body Mass Index  $\geq 30$  kg/m<sup>2</sup>;  
 SE=standard error

SUPPLEMENTARY DATA

**Supplementary Table 3.** A Comparison of Sociodemographic Health Behaviors and Clinical Characteristics by Sleep Duration among NHIS participants, 2004-2011 (N=130,943).

|                               | <b>Sleep Duration</b> |                |                 |
|-------------------------------|-----------------------|----------------|-----------------|
|                               | <b>≤ 6 hours</b>      | <b>7 hours</b> | <b>≥8 hours</b> |
| <b>Sample size, N</b>         | 39,326 (29)           | 39,632 (32)    | 51,985 (39)     |
| <b>Age, year ± SE</b>         | 48.8 ± 0.10           | 49.0 ± 0.11    | 53.2 ± 0.12     |
| <b>Age group, (%)</b>         |                       |                |                 |
| 35-49                         | 55                    | 54             | 44              |
| 50-64                         | 30                    | 30             | 28              |
| ≥65                           | 15                    | 16             | 28              |
| <b>Women</b>                  | 50                    | 49             | 53              |
| <b>Race/ethnicity</b>         |                       |                |                 |
| Non-Hispanic white men        | 43                    | 46             | 41              |
| Non-Hispanic black men        | 41                    | 44             | 46              |
| Non-Hispanic white women      | 7                     | 4              | 6               |
| Non-Hispanic black women      | 9                     | 5              | 7               |
| <b>Educational attainment</b> |                       |                |                 |
| <High school                  | 32                    | 27             | 33              |
| High school graduate          | 10                    | 6              | 11              |
| Some college                  | 32                    | 29             | 28              |
| ≥ College                     | 25                    | 38             | 28              |
| <b>Marital status</b>         |                       |                |                 |
| Married                       | 58                    | 66             | 61              |
| Divorced/separated/widowed    | 26                    | 19             | 23              |
| Never married                 | 16                    | 15             | 15              |
| <b>Living in poverty</b>      | 10                    | 5              | 9               |
| <b>Class of worker</b>        |                       |                |                 |
| Private wage                  | 74                    | 71             | 70              |
| Government                    | 18                    | 19             | 19              |
| Self employed                 | 9                     | 10             | 11              |
| <b>Occupation</b>             |                       |                |                 |
| Professional/Management       | 19                    | 25             | 19              |
| Support services              | 44                    | 47             | 47              |
| Laborers                      | 37                    | 28             | 34              |
| <b>Health behaviors</b>       |                       |                |                 |
| Smoking status                |                       |                |                 |
| Never                         | 48                    | 56             | 52              |
| Current                       | 24                    | 25             | 28              |
| Former                        | 27                    | 18             | 20              |
| Alcohol consumption           |                       |                |                 |
| Never                         | 15                    | 15             | 20              |
| Current                       | 67                    | 71             | 62              |
| Former                        | 18                    | 14             | 18              |
| Leisure-time physical         |                       |                |                 |

SUPPLEMENTARY DATA

|                                 |             |             |             |
|---------------------------------|-------------|-------------|-------------|
| activity                        |             |             |             |
| Never/unable                    | 37          | 28          | 38          |
| Low                             | 32          | 37          | 31          |
| High                            | 31          | 34          | 31          |
| <b>Clinical characteristics</b> |             |             |             |
| BMI (kg/m <sup>2</sup> )        | 28.7 ± 0.05 | 27.6 ± 0.04 | 27.6 ± 0.03 |
| Overweight/Obese                | 70          | 64          | 63          |
| Obese                           | 34          | 26          | 27          |
| Hypertension (yes)              | 35          | 28          | 36          |
| Diabetes (yes)                  | 10          | 7           | 11          |
| <b>General health status</b>    |             |             |             |
| Excellent/Very Good             | 54          | 68          | 58          |
| Good                            | 28          | 24          | 27          |
| Fair/Poor                       | 18          | 8           | 15          |
| <b>Region of country</b>        |             |             |             |
| Northeast                       | 19          | 19          | 16          |
| Midwest                         | 28          | 29          | 26          |
| South                           | 38          | 35          | 39          |
| West                            | 15          | 18          | 18          |

Overweight/Obese defined by Body Mass Index  $\geq 25$  kg/m<sup>2</sup>; Obesity defined by Body Mass Index  $\geq 30$  kg/m<sup>2</sup>

SUPPLEMENTARY DATA

**Supplementary Table 4.** A Comparison of Sociodemographic, Health Behaviors and Clinical Characteristics by Diabetes and Sleep Duration among NHIS participants, 2004-2011 (N=130,943).

|                               | Diabetes       |             |             | No Diabetes    |             |             |
|-------------------------------|----------------|-------------|-------------|----------------|-------------|-------------|
|                               | Sleep Duration |             |             | Sleep Duration |             |             |
|                               | ≤ 6            | 7           | ≥8          | ≤ 6            | 7           | ≥8          |
| <b>Sample size, N (%)</b>     | 4,250 (32)     | 2,967 (23)  | 6,038 (45)  | 35,076 (30)    | 36,665 (32) | 45,947 (38) |
| <b>Age, year ± SE</b>         | 58.1 ± 0.25    | 58.8 ± 0.30 | 63.7 ± 0.23 | 47.7 ± 0.10    | 48.3 ± 0.11 | 52.0 ± 0.12 |
| <b>Age group, (%)</b>         |                |             |             |                |             |             |
| 35-49                         | 26             | 23          | 16          | 58             | 56          | 48          |
| 50-64                         | 44             | 44          | 34          | 28             | 29          | 27          |
| ≥65                           | 30             | 33          | 51          | 13             | 15          | 25          |
| <b>Women</b>                  | 51             | 47          | 48          | 50             | 49          | 54          |
| <b>Educational attainment</b> |                |             |             |                |             |             |
| <High school                  | 37             | 37          | 37          | 32             | 27          | 32          |
| High school graduate          | 18             | 11          | 20          | 10             | 6           | 10          |
| Some college                  | 30             | 28          | 26          | 33             | 29          | 28          |
| ≥ College                     | 15             | 24          | 17          | 26             | 39          | 29          |
| <b>Marital status</b>         |                |             |             |                |             |             |
| Married                       | 55             | 64          | 60          | 58             | 66          | 61          |
| Divorced/separated/widowed    | 34             | 27          | 32          | 25             | 19          | 22          |
| Never married                 | 11             | 9           | 8           | 17             | 15          | 16          |
| <b>Living in poverty</b>      | 15             | 8           | 12          | 10             | 5           | 9           |
| <b>Class of worker</b>        |                |             |             |                |             |             |
| Private wage                  | 71             | 69          | 70          | 73             | 71          | 70          |
| Government                    | 21             | 22          | 21          | 17             | 19          | 19          |
| Self employed                 | 7              | 10          | 9           | 9              | 10          | 11          |
| <b>Occupation</b>             |                |             |             |                |             |             |
| Professional/Management       | 14             | 19          | 15          | 20             | 25          | 20          |
| Support services              | 42             | 44          | 42          | 44             | 47          | 48          |
| Laborers                      | 44             | 37          | 43          | 36             | 28          | 32          |

SUPPLEMENTARY DATA

|                                       |             |             |             |             |             |             |
|---------------------------------------|-------------|-------------|-------------|-------------|-------------|-------------|
| <b>Health behaviors</b>               |             |             |             |             |             |             |
| Usual sleep (hours)                   | 5.5 ± 0.01  | 7           | 8.7 ± 0.03  | 5.6 ± 0.00  | 7           | 8.4 ± 0.01  |
| <b>Smoking status</b>                 |             |             |             |             |             |             |
| Never                                 | 44          | 49          | 46          | 49          | 57          | 53          |
| Current                               | 35          | 35          | 39          | 23          | 24          | 27          |
| Former                                | 21          | 16          | 15          | 28          | 19          | 21          |
| <b>Alcohol consumption</b>            |             |             |             |             |             |             |
| Never                                 | 24          | 22          | 27          | 15          | 14          | 19          |
| Current                               | 45          | 51          | 39          | 69          | 73          | 65          |
| Former                                | 31          | 26          | 34          | 17          | 13          | 16          |
| <b>Leisure-time physical activity</b> |             |             |             |             |             |             |
| Never/unable                          | 52          | 39          | 54          | 35          | 27          | 37          |
| Low                                   | 24          | 33          | 23          | 33          | 38          | 32          |
| High                                  | 24          | 28          | 22          | 32          | 35          | 32          |
| <b>Clinical characteristics</b>       |             |             |             |             |             |             |
| BMI (kg/m <sup>2</sup> )              | 33.0 ± 0.16 | 31.9 ± 0.15 | 31.4 ± 0.11 | 28.2 ± 0.04 | 27.3 ± 0.04 | 27.2 ± 0.03 |
| Overweight/Obese                      | 87          | 86          | 83          | 68          | 63          | 61          |
| Obese                                 | 61          | 54          | 51          | 31          | 24          | 24          |
| Hypertension (yes)                    | 73          | 68          | 73          | 30          | 26          | 31          |
| <b>General health status</b>          |             |             |             |             |             |             |
| Excellent/Very Good                   | 19          | 30          | 21          | 58          | 71          | 62          |
| Good                                  | 34          | 43          | 38          | 28          | 23          | 26          |
| Fair/Poor                             | 47          | 28          | 41          | 14          | 6           | 12          |
| <b>Region of country</b>              |             |             |             |             |             |             |
| Northeast                             | 16          | 16          | 15          | 19          | 19          | 17          |
| Midwest                               | 28          | 30          | 27          | 28          | 29          | 26          |
| South                                 | 44          | 39          | 43          | 38          | 35          | 39          |
| West                                  | 13          | 15          | 15          | 16          | 18          | 19          |

Overweight/Obese defined by Body Mass Index ≥25 kg/m<sup>2</sup>; Obesity defined by Body Mass Index ≥30 kg/m<sup>2</sup>; SE=standard error



SUPPLEMENTARY DATA

Supplementary Figure 1. Study Flow Diagram.

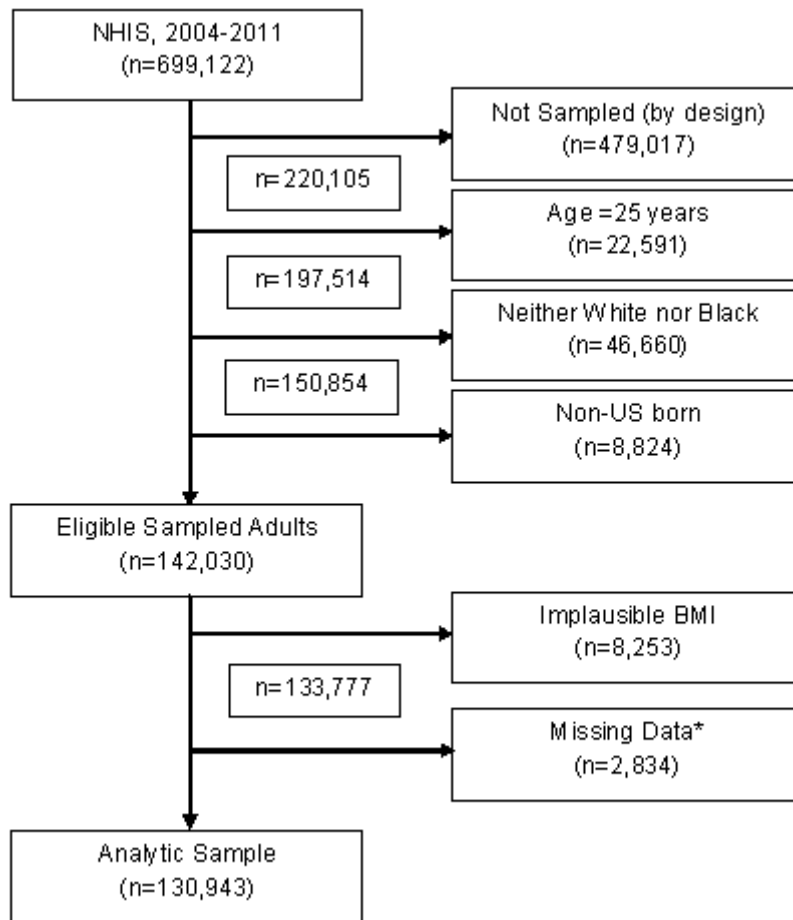

NHIS=National Health Interview Survey; NH=Non-Hispanic; BMI=body mass index;  
\*Missing data on sleep and diabetes status

SUPPLEMENTARY DATA

**Supplementary Figure 2.** Usual Sleep Duration among Blacks and Whites.

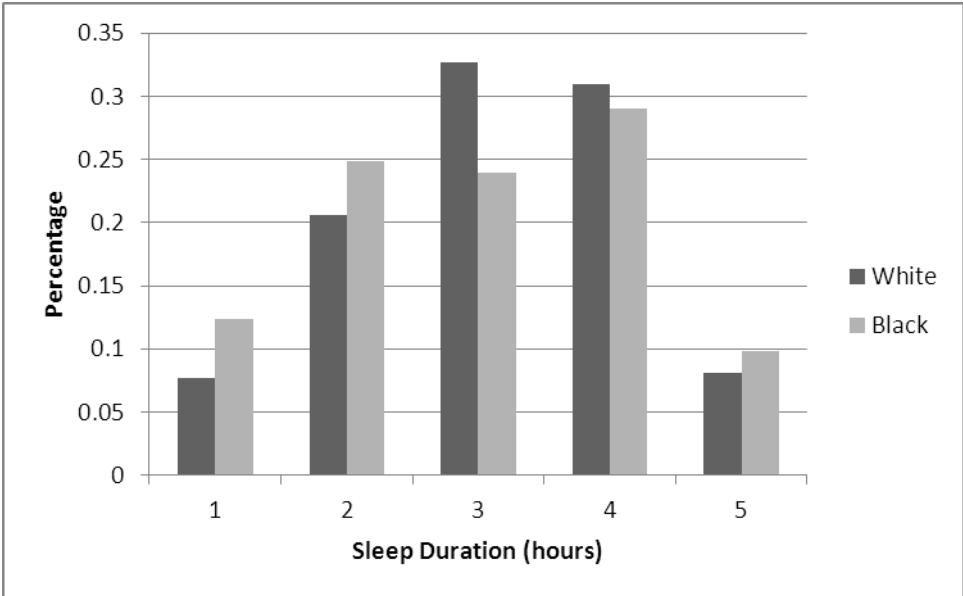

\*weighted estimates
